# Supplementary material for: Prospective STAR-Guided Ablation in Persistent Atrial Fibrillation Using Sequential Mapping With Multipolar Catheters
Source: PubMed Central journal article supplement — Circ Arrhythm Electrophysiol. 2020 Sep 9;13(10):e008824. doi: 10.1161/CIRCEP.120.008824 (PMC7566307; doi:10.1161/circep.120.008824), 2020-09-09
Supplement: hae-13-e008824-s001.pdf [file hae-13-e008824-s001.pdf]

## SUPPLEMENTAL MATERIAL

**Supplemental Table 1-** *Demonstrates the number of AFD identified and ablated in each patient and the achieved ablation response on a per AFD basis.*

| Patient ID | Number of AFD <sup>†</sup> identified | Number of AFD ablated | Anatomical location of AFD | Ablation response | Ablation duration min |
|------------|---------------------------------------|-----------------------|----------------------------|-------------------|-----------------------|
| 1          | 5                                     | 5                     | Lateral                    | No effect         | 2.1                   |
|            |                                       |                       | Anterior/Mid septal        | SCL <sup>‡</sup>  | 2.4                   |
|            |                                       |                       | Anterior LAA <sup>§</sup>  | SCL               | 3.1                   |
|            |                                       |                       | Mid posterior              | SCL               | 2.1                   |
|            |                                       |                       | Lateral                    | AT                | 2.5                   |
| 2          | 3                                     | 3                     | Mid posterior              | No effect         | 1.8                   |
|            |                                       |                       | Mid roof                   | SCL               | 2.5                   |
|            |                                       |                       | LAA ridge/lateral          | No effect         | 2.3                   |
| 3          | 1                                     | 1                     | Mid anterior               | AT                | 3.1                   |
| 4          | 0                                     | 0                     | SR on PVI <sup>  </sup>    | SR                | /                     |
| 5          | 2                                     | 2                     | LAA/Roof                   | SCL               | 2.8                   |
|            |                                       |                       | Anterior                   | SCL               | 3.3                   |
| 6          | 4                                     | 2                     | LAA/Roof                   | SCL               | 3.0                   |
|            |                                       |                       | Mid anterior               | AT                | 2.8                   |
|            |                                       |                       | Mid posterior              | Not targeted      |                       |

|    |   |   |                                      |              |     |
|----|---|---|--------------------------------------|--------------|-----|
|    |   |   | Lateral                              | Not targeted |     |
| 7  | 4 | 3 | High anterior                        | SCL          | 2.1 |
|    |   |   | Posterior roof                       | No effect    | 2.9 |
|    |   |   | Endocardial proximal CS <sup>#</sup> | AT           | 3.2 |
|    |   |   | Mid anterior                         | Not targeted |     |
| 8  | 3 | 2 | Anterior RUPV <sup>**</sup>          | SCL          | 3.1 |
|    |   |   | Roof/RUPV                            | AT           | 2.1 |
|    |   |   | Anteroseptum                         | Not targeted |     |
| 9  | 3 | 2 | Mid anterior                         | SCL          | 2.5 |
|    |   |   | Mid roof                             | SR           | 1.9 |
|    |   |   | Endocardial CS distal                | Not targeted |     |
| 10 | 0 | 0 | SR on PVI                            | SR           | /   |
| 11 | 3 | 2 | Septal                               | SCL          | 3.0 |
|    |   |   | Roof                                 | AT           | 2.2 |
|    |   |   | Inferior RUPV                        | Not targeted |     |
| 12 | 3 | 3 | Mid lateral                          | SCL          | 2.0 |
|    |   |   | Posteroseptal                        | No effect    | 2.3 |
|    |   |   | Low posterior                        | AT           | 2.9 |
| 13 | 3 | 2 | Low septal                           | SCL          | 2.1 |
|    |   |   | Mid lateral                          | SR           | 1.9 |

|    |   |   |                   |              |     |
|----|---|---|-------------------|--------------|-----|
|    |   |   | Mid roof          | Not targeted |     |
| 14 | 3 | 3 | Low septum        | No effect    | 2.3 |
|    |   |   | Low anterior      | SCL          | 2.2 |
|    |   |   | Posterior/Lateral | AT           | 1.9 |
| 15 | 2 | 2 | Mid roof          | SCL          | 2.1 |
|    |   |   | Lateral           | SR           | 3.2 |
| 16 | 3 | 1 | High anterior     | AT           | 2.4 |
|    |   |   | Mid roof          | Not targeted |     |
|    |   |   | Inferior/Lateral  | Not targeted |     |
| 17 | 6 | 6 | Roof/LAA          | No effect    | 2.5 |
|    |   |   | Mid posterior     | No effect    | 2.4 |
|    |   |   | Low septum        | SCL          | 3.1 |
|    |   |   | Mid roof          | SCL          | 3.0 |
|    |   |   | Mid anterior      | SCL          | 3.4 |
|    |   |   | Anteroseptum      | No effect    | 3.1 |
| 18 | 3 | 3 | High anterior     | No effect    | 2.5 |
|    |   |   | Roof/RUPV         | SCL          | 2.7 |
|    |   |   | Roof/LAA          | SR           | 1.9 |
| 19 | 3 | 3 | Mid posterior     | No effect    | 2.0 |
|    |   |   | High anterior     | SCL          | 3.2 |

|    |   |   |                    |              |     |
|----|---|---|--------------------|--------------|-----|
|    |   |   | Mid roof           | SR           | 2.7 |
| 20 | 5 | 4 | Posterior/Inferior | No effect    | 2.8 |
|    |   |   | LAA/Roof           | SCL          | 2.3 |
|    |   |   | Low anterior       | SCL          | 3.1 |
|    |   |   | Mid lateral        | AT           | 2.2 |
|    |   |   | Septal             | Not targeted |     |
| 21 | 2 | 2 | High posterior     | SCL          | 2.8 |
|    |   |   | Mid anterior       | AT           | 2.1 |
| 22 | 4 | 4 | Lateral            | SCL          | 2.1 |
|    |   |   | LAA/Roof           | SCL          | 3.2 |
|    |   |   | RUPV/Anteroseptum  | No effect    | 2.6 |
|    |   |   | Mid Septum         | No effect    | 3.4 |
| 23 | 3 | 2 | High posterior     | SCL          | 2.8 |
|    |   |   | Mid anterior       | AT           | 3.4 |
|    |   |   | LAA/Roof           | Not targeted |     |
| 24 | 3 | 2 | Mid anterior       | SCL          | 2.8 |
|    |   |   | Lateral            | SCL          | 3.3 |
|    |   |   | Anteroseptum       | Not targeted |     |
| 25 | 2 | 2 | Mid posterior      | No effect    | 2.2 |

|    |   |   |                       |              |     |
|----|---|---|-----------------------|--------------|-----|
|    |   |   | Mid roof              | AT           | 2.9 |
| 26 | 3 | 3 | Mid anterior          | No effect    | 3.3 |
|    |   |   | Inferior RUPV         | SCL          | 3.1 |
|    |   |   | Septum                | SCL          | 2.8 |
| 27 | 2 | 2 | Posterior/inferior    | SCL          | 2.4 |
|    |   |   | Distal endocardial CS | AT           | 2.6 |
| 28 | 2 | 2 | Roof/LAA              | SCL          | 2.9 |
|    |   |   | Low anterior          | SR           | 2.9 |
| 29 | 3 | 2 | Mid lateral           | SCL          | 3.6 |
|    |   |   | Posteroseptum         | SR           | 2.7 |
|    |   |   | Mid roof              | Not targeted | 3.5 |
| 30 | 0 | 0 | AT on PVI             | AT           | /   |

†AFD- Atrial fibrillation driver

‡SCL- Slowing of CL

§LAA- Left atrial appendage

||PVI- Pulmonary vein isolation

#CS- Coronary sinus

\*\*RUPV- Right upper pulmonary vein
