# Supplementary material for: Prospective STAR-Guided Ablation in Persistent Atrial Fibrillation Using Sequential Mapping With Multipolar Catheters
Source: PubMed Central journal article supplement — Circ Arrhythm Electrophysiol. 2020 Sep 9;13(10):e008824. doi: 10.1161/CIRCEP.120.008824 (PMC7566307; doi:10.1161/circep.120.008824), 2020-09-09
Supplement: hae-13-e008824-s002.pdf [file hae-13-e008824-s002.pdf]

# STAR MAPPING

PentaRay, IntellaMap Orion, or  
Advisor HD Grid catheters

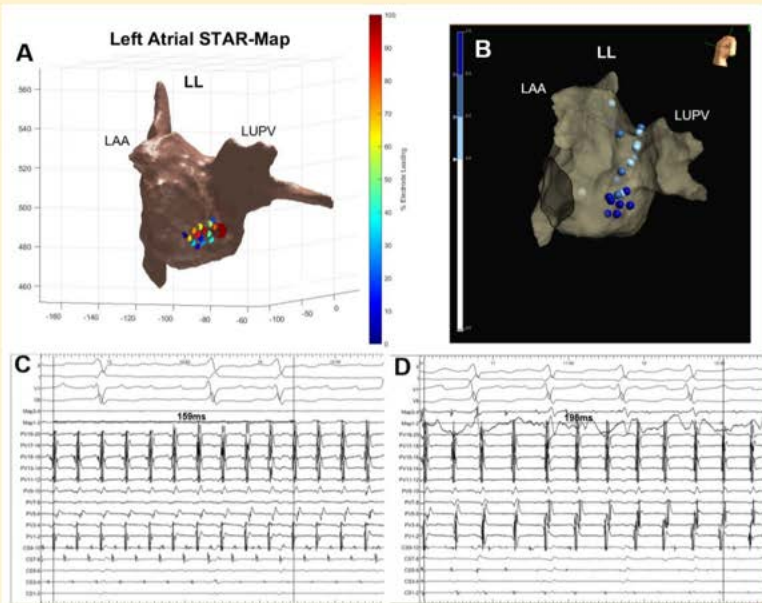

- 27 persistent AF patients
- 83 potential AF Drivers ( $3.1 \pm 1.0$  per patient) - 70 targeted with ablation ( $2.6 \pm 1.0$  per patient).
- Ablation response at 54 AF Drivers: 21 AF terminated and 33 CL slowed in all 27 patients.
- At  $17.3 \pm 10.1$  months, 22/27 (81.5%) free from AF/AT off anti-arrhythmic drugs
